# Supplementary material for: A first-principles study of water adsorbed on flat and stepped silver surfaces
Source: Royal Society of Chemistry journal article supplement (doi:10.1039/d1cp04618g), 2022-01-01
Supplement: d1cp04618g1.pdf [file d1cp04618g1.pdf]

## A first principle study of water adsorbed on flat and stepped silver surfaces

Xiaohang Lin<sup>a\*</sup>, Anchen Shao<sup>a</sup>, Minghao Hua<sup>a</sup>, Xuelei Tian<sup>a</sup>

<sup>a</sup> Key Laboratory for Liquid-Solid Structural Evolution and Processing of Materials, Ministry of Education, School of Materials Science and Engineering, Shandong University, Jinan ,250061, China

\*Corresponding author. E-mail: lxh12345@sdu.edu.cn.

### Test results of simulation parameters

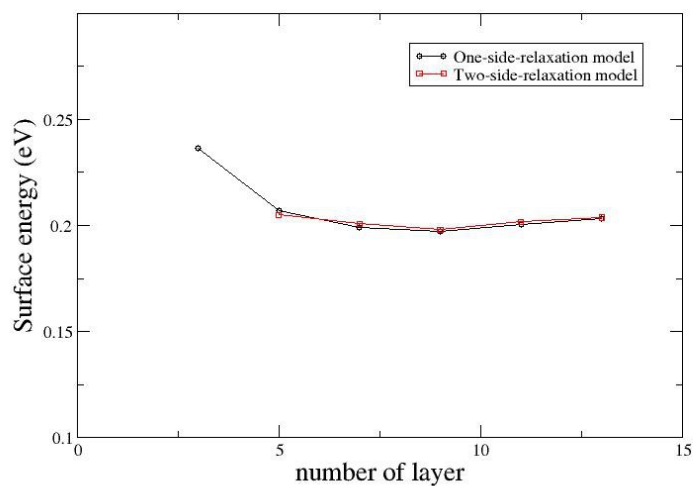

Fig. S1 The surface energy of Ag(100) surface converge with respect to the number of layers with two different slab model.

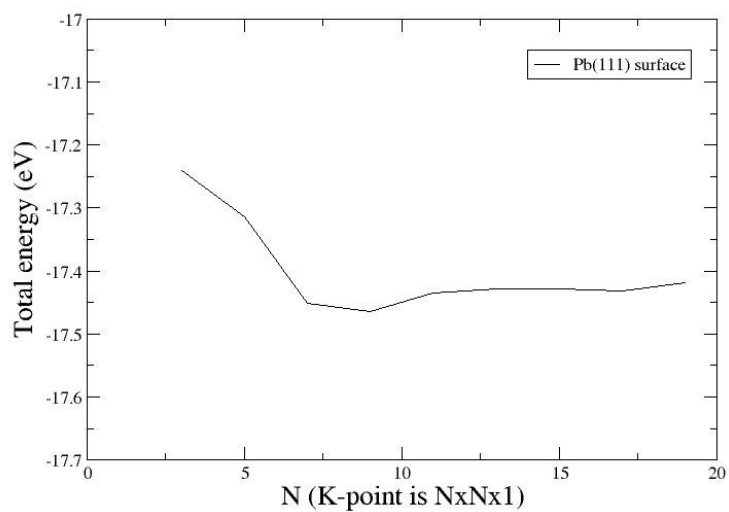

Fig. S2 The total energy of Ag(100) surface converge with respect to the number of K-point

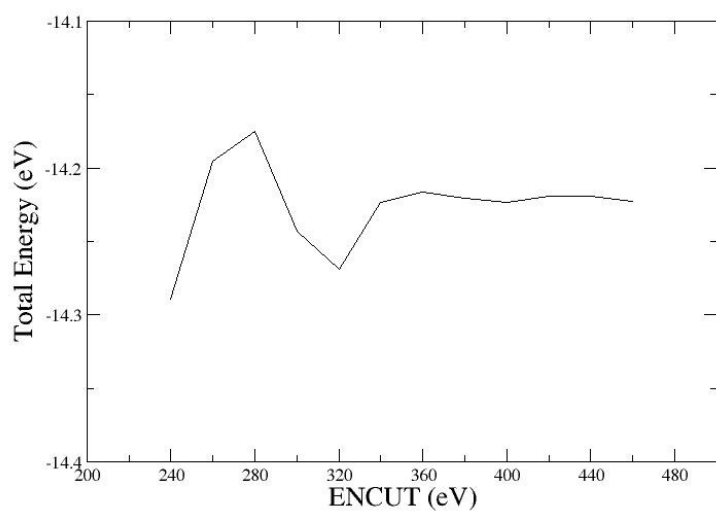

Fig. S3 The total energy of water molecule converge with respect to the value of the Encut

## Structure information

Ag(100) within a 3 x 3 geometry POSCAR

Ag(100)

1.0000000000000000

|                    |                    |                     |
|--------------------|--------------------|---------------------|
| 8.8200000000000003 | 0.0000000000000000 | 0.0000000000000000  |
| 0.0000000000000000 | 8.8200000000000003 | 0.0000000000000000  |
| 0.0000000000000000 | 0.0000000000000000 | 28.3150000000000013 |

45

Selective dynamics

Direct

|                    |                    |                    |   |   |   |
|--------------------|--------------------|--------------------|---|---|---|
| 0.0572562358276656 | 0.0000000000000000 | 0.0000000000000000 | F | F | F |
| 0.0572562358276656 | 0.0000000000000000 | 0.1468479604449939 | F | F | F |
| 0.0572562358276656 | 0.0000000000000000 | 0.2932018493337858 | T | T | T |
| 0.2239229024943299 | 0.1666666666666643 | 0.0734239802224934 | F | F | F |
| 0.2239229024943299 | 0.1666666666666643 | 0.2208972872956667 | T | T | T |
| 0.3905895691609942 | 0.0000000000000000 | 0.0000000000000000 | F | F | F |
| 0.3905895691609942 | 0.0000000000000000 | 0.1468479604449939 | F | F | F |
| 0.3905895691609942 | 0.0000000000000000 | 0.2932018493337858 | T | T | T |
| 0.5572562358276656 | 0.1666666666666643 | 0.0734239802224934 | F | F | F |
| 0.5572562358276656 | 0.1666666666666643 | 0.2208972872956667 | T | T | T |
| 0.7239229024943299 | 0.0000000000000000 | 0.0000000000000000 | F | F | F |
| 0.7239229024943299 | 0.0000000000000000 | 0.1468479604449939 | F | F | F |
| 0.7239229024943299 | 0.0000000000000000 | 0.2932018493337858 | T | T | T |
| 0.8905895691609942 | 0.1666666666666643 | 0.0734239802224934 | F | F | F |
| 0.8905895691609942 | 0.1666666666666643 | 0.2208972872956667 | T | T | T |
| 0.0572562358276656 | 0.3333333333333357 | 0.0000000000000000 | F | F | F |
| 0.0572562358276656 | 0.3333333333333357 | 0.1468479604449939 | F | F | F |
| 0.0572562358276656 | 0.3333333333333357 | 0.2932018493337858 | T | T | T |
| 0.2239229024943299 | 0.5000000000000000 | 0.0734239802224934 | F | F | F |
| 0.2239229024943299 | 0.5000000000000000 | 0.2208972872956667 | T | T | T |
| 0.3905895691609942 | 0.3333333333333357 | 0.0000000000000000 | F | F | F |
| 0.3905895691609942 | 0.3333333333333357 | 0.1468479604449939 | F | F | F |
| 0.3905895691609942 | 0.3333333333333357 | 0.2932018493337858 | T | T | T |
| 0.5572562358276656 | 0.5000000000000000 | 0.0734239802224934 | F | F | F |
| 0.5572562358276656 | 0.5000000000000000 | 0.2208972872956667 | T | T | T |
| 0.7239229024943299 | 0.3333333333333357 | 0.0000000000000000 | F | F | F |
| 0.7239229024943299 | 0.3333333333333357 | 0.1468479604449939 | F | F | F |
| 0.7239229024943299 | 0.3333333333333357 | 0.2932018493337858 | T | T | T |
| 0.8905895691609942 | 0.5000000000000000 | 0.0734239802224934 | F | F | F |
| 0.8905895691609942 | 0.5000000000000000 | 0.2208972872956667 | T | T | T |
| 0.0572562358276656 | 0.6666666666666643 | 0.0000000000000000 | F | F | F |
| 0.0572562358276656 | 0.6666666666666643 | 0.1468479604449939 | F | F | F |
| 0.0572562358276656 | 0.6666666666666643 | 0.2932018493337858 | T | T | T |
| 0.2239229024943299 | 0.8333333333333357 | 0.0734239802224934 | F | F | F |
| 0.2239229024943299 | 0.8333333333333357 | 0.2208972872956667 | T | T | T |
| 0.3905895691609942 | 0.6666666666666643 | 0.0000000000000000 | F | F | F |

|                    |                    |                    |   |   |   |
|--------------------|--------------------|--------------------|---|---|---|
| 0.3905895691609942 | 0.6666666666666643 | 0.1468479604449939 | F | F | F |
| 0.3905895691609942 | 0.6666666666666643 | 0.2932018493337858 | T | T | T |
| 0.5572562358276656 | 0.8333333333333357 | 0.0734239802224934 | F | F | F |
| 0.5572562358276656 | 0.8333333333333357 | 0.2208972872956667 | T | T | T |
| 0.7239229024943299 | 0.6666666666666643 | 0.0000000000000000 | F | F | F |
| 0.7239229024943299 | 0.6666666666666643 | 0.1468479604449939 | F | F | F |
| 0.7239229024943299 | 0.6666666666666643 | 0.2932018493337858 | T | T | T |
| 0.8905895691609942 | 0.8333333333333357 | 0.0734239802224934 | F | F | F |
| 0.8905895691609942 | 0.8333333333333357 | 0.2208972872956667 | T | T | T |

Ag(511) within a 1 x 3 geometry POSCAR

Ag5111x3

1.0000000000000000

|                     |                    |                     |
|---------------------|--------------------|---------------------|
| 7.777999999999996   | 0.0000000000000000 | 0.0000000000000000  |
| -1.6663200000000000 | 8.6613000000000007 | 0.0000000000000000  |
| 0.0000000000000000  | 0.0000000000000000 | 31.2020000000000017 |

45

Selective dynamics

Direct

|                    |                    |                    |   |   |   |
|--------------------|--------------------|--------------------|---|---|---|
| 0.0052360951708295 | 0.1585327837622543 | 0.9821806294468303 | F | F | F |
| 0.1534966737730201 | 0.1832403911652989 | 0.1104095891288992 | F | F | F |
| 0.2974912631361140 | 0.2089100691987592 | 0.2418177343428666 | T | T | T |
| 0.5655864401405871 | 0.0869502224405846 | 0.2870295762602008 | T | T | T |
| 0.3756056714237843 | 0.2201863461605100 | 0.9565412473559363 | F | F | F |
| 0.6348417841757694 | 0.0967637652546358 | 0.0078520607653374 | F | F | F |
| 0.5238662500259750 | 0.2448939535635546 | 0.0847702070380123 | F | F | F |
| 0.7831023627779601 | 0.1214713726576875 | 0.1360489712197932 | F | F | F |
| 0.9321092295256037 | 0.1476610734881054 | 0.2638553356559741 | T | T | T |
| 0.2645015695187851 | 0.0349832011360860 | 0.0334914428562243 | F | F | F |
| 0.4129492806718802 | 0.0609406887773578 | 0.1623863162051813 | T | T | T |
| 0.6735086657669038 | 0.2713122151485408 | 0.2128525718150336 | T | T | T |
| 0.745999824188444  | 0.2819553646681214 | 0.9309018652650494 | F | F | F |
| 0.8941319932658303 | 0.3066629720711660 | 0.0591308249471183 | F | F | F |
| 0.0459651572932876 | 0.3331651886344525 | 0.1882119200315043 | T | T | T |
| 0.0052360951708295 | 0.4918661170955829 | 0.9821806294468303 | F | F | F |
| 0.1534966737730201 | 0.5165737244986346 | 0.1104095891288992 | F | F | F |
| 0.2982720173558955 | 0.5417081082966581 | 0.2415510046465050 | T | T | T |
| 0.5671851023670456 | 0.4207120264804007 | 0.2870197001657365 | T | T | T |
| 0.3756056714237843 | 0.5535196794938386 | 0.9565412473559363 | F | F | F |
| 0.6348417841757694 | 0.4300970985879715 | 0.0078520607653374 | F | F | F |
| 0.5238662500259750 | 0.5782272868968832 | 0.0847702070380123 | F | F | F |
| 0.7831023627779601 | 0.4548047059910161 | 0.1360489712197932 | F | F | F |
| 0.9334720227570148 | 0.4811491417272772 | 0.2638679117880142 | T | T | T |
| 0.2645015695187851 | 0.3683165344694217 | 0.0334914428562243 | F | F | F |

|                    |                    |                    |   |   |   |
|--------------------|--------------------|--------------------|---|---|---|
| 0.4128748521157342 | 0.3939985478589905 | 0.1623326689242565 | T | T | T |
| 0.6738440032624756 | 0.6044444096529937 | 0.2127812759748979 | T | T | T |
| 0.7459999824188444 | 0.6152886980014571 | 0.9309018652650494 | F | F | F |
| 0.8941319932658303 | 0.6399963054045017 | 0.0591308249471183 | F | F | F |
| 0.0461518557335960 | 0.6663697050373570 | 0.1881535471561607 | T | T | T |
| 0.0052360951708295 | 0.8251994504289186 | 0.9821806294468303 | F | F | F |
| 0.1534966737730201 | 0.8499070578319632 | 0.1104095891288992 | F | F | F |
| 0.2976040494977051 | 0.8751300662230566 | 0.2414844018708741 | T | T | T |
| 0.5657674024544960 | 0.7535184696863145 | 0.2870171466423865 | T | T | T |
| 0.3756056714237843 | 0.8868530128271743 | 0.9565412473559363 | F | F | F |
| 0.6348417841757694 | 0.7634304319213072 | 0.0078520607653374 | F | F | F |
| 0.5238662500259750 | 0.9115606202302189 | 0.0847702070380123 | F | F | F |
| 0.7831023627779601 | 0.7881380393243518 | 0.1360489712197932 | F | F | F |
| 0.9322020241416886 | 0.8142382595360910 | 0.2637284321922804 | T | T | T |
| 0.2645015695187851 | 0.7016498678027574 | 0.0334914428562243 | F | F | F |
| 0.4131165813413755 | 0.7273260022804688 | 0.1623358997709657 | T | T | T |
| 0.6732826543474217 | 0.9379073067813557 | 0.2128569561021502 | T | T | T |
| 0.7459999824188444 | 0.9486220313347857 | 0.9309018652650494 | F | F | F |
| 0.8941319932658303 | 0.9733296387378374 | 0.0591308249471183 | F | F | F |
| 0.0460120380350904 | 0.0000490982441259 | 0.1882213251149515 | T | T | T |
